# Supplementary material
Source: publisher figshare collection journal article supplement (https://sage.figshare.com/ndownloader/files/40903467)
Supplement: Supplementary file 1 [file 40903467]

Supporting Table 1. Characteristics of cases of GEM monotherapy (n=35)

|                                                           |        |    |
|-----------------------------------------------------------|--------|----|
| The course of platinum-based chemotherapy                 |        |    |
|                                                           | 3 to 6 | 30 |
|                                                           | 1 or 2 | 5  |
| Reasons for transition to maintenance GEM monotherapy     |        |    |
| SD or better response in primary chemotherapy             |        | 29 |
| Primary chemotherapy discontinuation due to adverse event |        | 2  |
| Termination of primary chemotherapy with PD               |        | 4  |
